# Supplementary material
Source: publisher site journal article supplement (http://www.kjim.org/upload/media/kjim-2019-111-suppl.pdf)
Supplement: Supplementary file 1 [file kjim-2019-111-suppl.pdf]

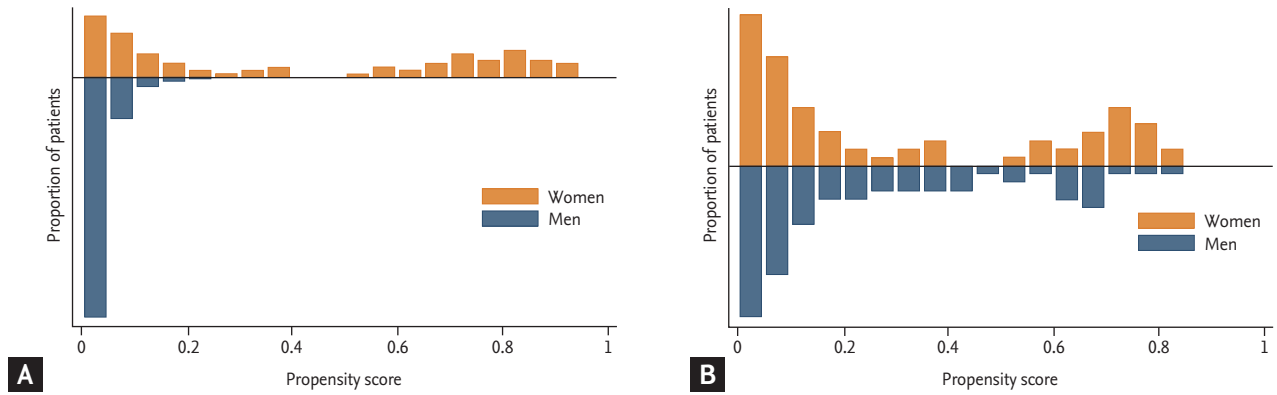

**Supplementary Figure 1.** Histograms of propensity score distribution (TIFF). (A) Before propensity score matching (B) after propensity score matching.
